# Supplementary material for: Inhaled methoxyflurane (Penthrox) for analgesia in trauma: a systematic review protocol
Source: Springer Nature journal article supplement (doi:10.1186/s13643-021-01600-0), 2021-02-03
Supplement: MOESM2 [file 18830214]

## Medline via PubMed Search Strategy

|                                                                                 | <b>Search group</b>                             |
|---------------------------------------------------------------------------------|-------------------------------------------------|
| 1 Randomised controlled trial [pt]                                              | <b>Study design</b>                             |
| 2 Controlled clinical trial [pt]                                                |                                                 |
| 3 Randomized [tiab]                                                             |                                                 |
| 4 Randomised [tiab]                                                             |                                                 |
| 5 Placebo [tiab]                                                                |                                                 |
| 6 Drug therapy [sh]                                                             |                                                 |
| 7 Randomly [tiab]                                                               |                                                 |
| 8 Trial [tiab]                                                                  |                                                 |
| 9 Groups [tiab]                                                                 |                                                 |
| 10 1 OR 2 OR 3 OR 4 OR 5 OR 6 OR 7 OR 8 OR 9                                    |                                                 |
| 11 Methoxyflurane [tiab]                                                        | <b>Intervention</b>                             |
| 12 *Methoxyflurane                                                              |                                                 |
| 13 Analgizer [tiab]                                                             |                                                 |
| 14 Pentrox [tiab]                                                               |                                                 |
| 15 Penthrane [tiab]                                                             |                                                 |
| 16 11 OR 12 OR 13 OR 14 OR 15                                                   |                                                 |
| 17 Analgesi* [tiab]                                                             | <b>Trauma or<br/>Emergency Related<br/>Pain</b> |
| 18 Pain [exp]                                                                   |                                                 |
| 19 17 OR 18                                                                     |                                                 |
| 20 Traumatic injur* [tiab]                                                      |                                                 |
| 21 Trauma [exp]                                                                 |                                                 |
| 22 Emergency department [tiab]                                                  |                                                 |
| 23 Emergency [exp]                                                              |                                                 |
| 24 Pre*hospital OR pre[adj1]hospital                                            |                                                 |
| 25 Wound* OR laceration* OR contusion* OR burn* OR<br>dislocation* OR fracture* |                                                 |
| 26 20 OR 21 OR 22 OR 23 OR 24 OR 25                                             |                                                 |
| 27 19 AND 26                                                                    |                                                 |
| 28 10 AND 16 AND 27                                                             |                                                 |
